# Supplementary material for: PPP2R2D suppresses IL-2 production and Treg function
Source: JCI Insight. 2020 Oct 2;5(19):e138215. doi: 10.1172/jci.insight.138215 (PMC7566706; doi:10.1172/jci.insight.138215)
Supplement: Supplemental data [file jciinsight-5-138215-s050.pdf]

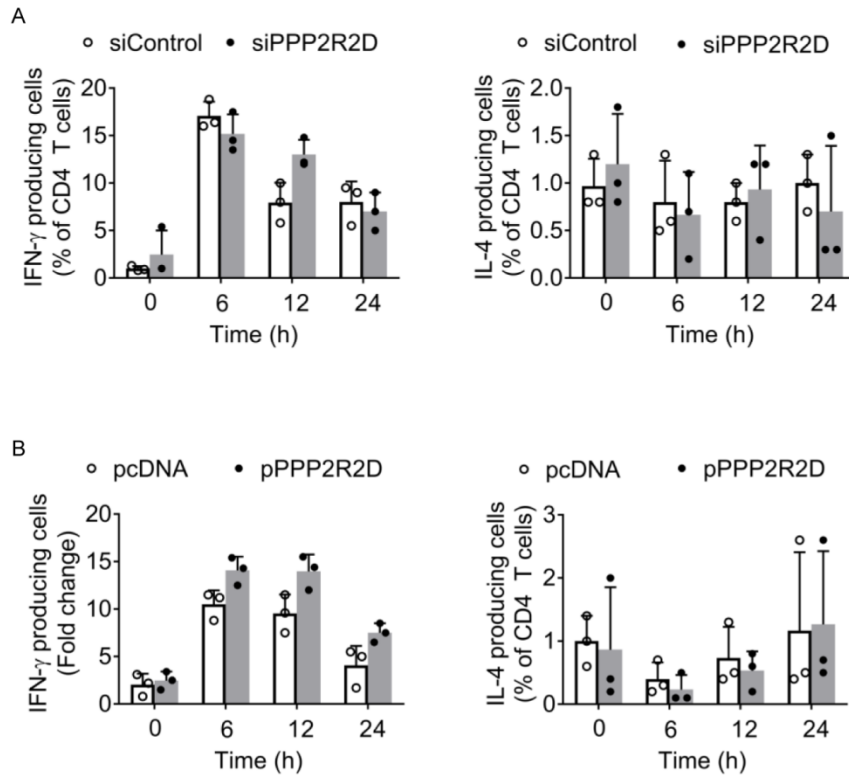

**Supplemental Figure 1. PPP2R2D does not affect human IFN- $\gamma$  and IL-4 producing T cells.**

Human T cells derived from PBMCs of healthy subjects were subjected to silencing of PPP2R2D (**A**) or to transfecting with PPP2R2D plasmid (**B**), and rested overnight before stimulation with anti-CD3 (OKT3) and anti-CD28 for indicated time. Intracellular staining of IFN- $\gamma$  and IL-4 production in T cells were analyzed by FACS.

A

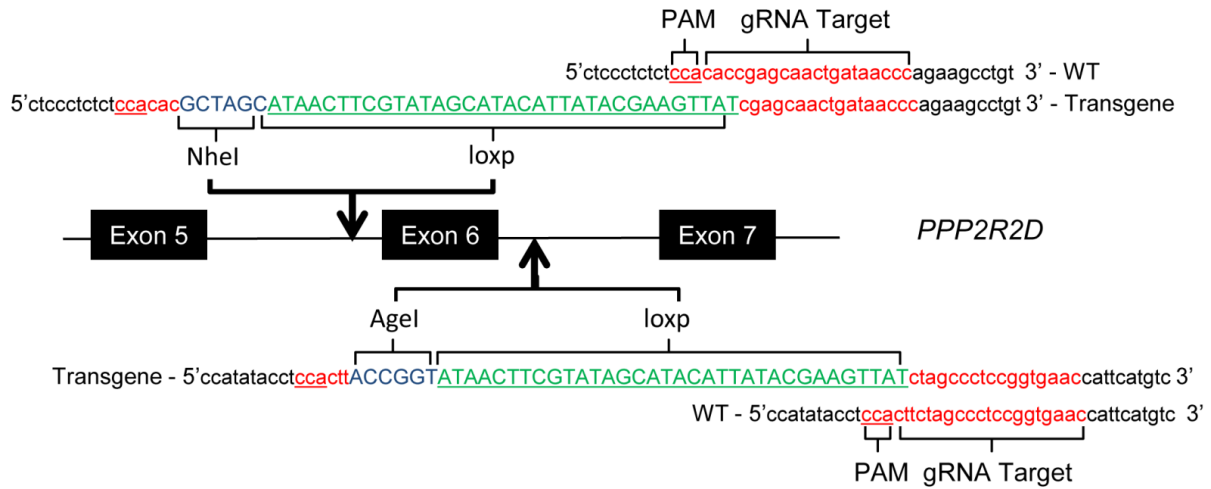

B

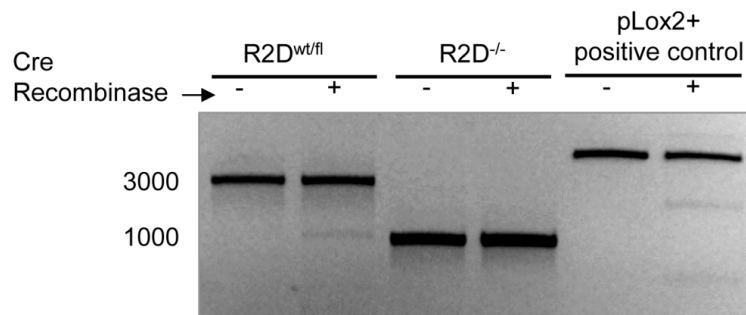

C

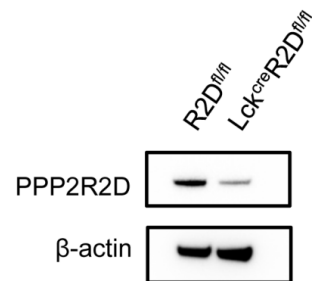

## Supplemental Figure 2. Strategy to generate a PPP2R2D conditional knockout mouse.

(A) Graphical illustration that gRNAs targeting intronic regions flanking Exon 6 of *PPP2R2D*, and donor single stranded DNA oligonucleotides each containing a loxp consensus sequence and restriction enzyme sites were introduced into pronuclear zygotes in order to generate R2D<sup>fl/fl</sup> mice. (B) Excision of Exon 6 was confirmed by *in vitro* Cre recombination of PCR products amplified from candidate founders. DNA was isolated from R2D<sup>wt/fl</sup> and R2D<sup>-/-</sup> mice and amplified by PCR using the primers containing the restriction enzyme sites shown in (A). Then the PCR products were incubated at 37 °C in the presence or absence of Cre recombinase. Linearized pLox2+ DNA which is 3,625 bp in length, with a loxP site approximately 400 bp from each end serves as a positive control. (C) Western blot analysis of PPP2R2D expression in T cells which were isolated from R2D<sup>fl/fl</sup> and Lck<sup>cre</sup>R2D<sup>fl/fl</sup> mice.

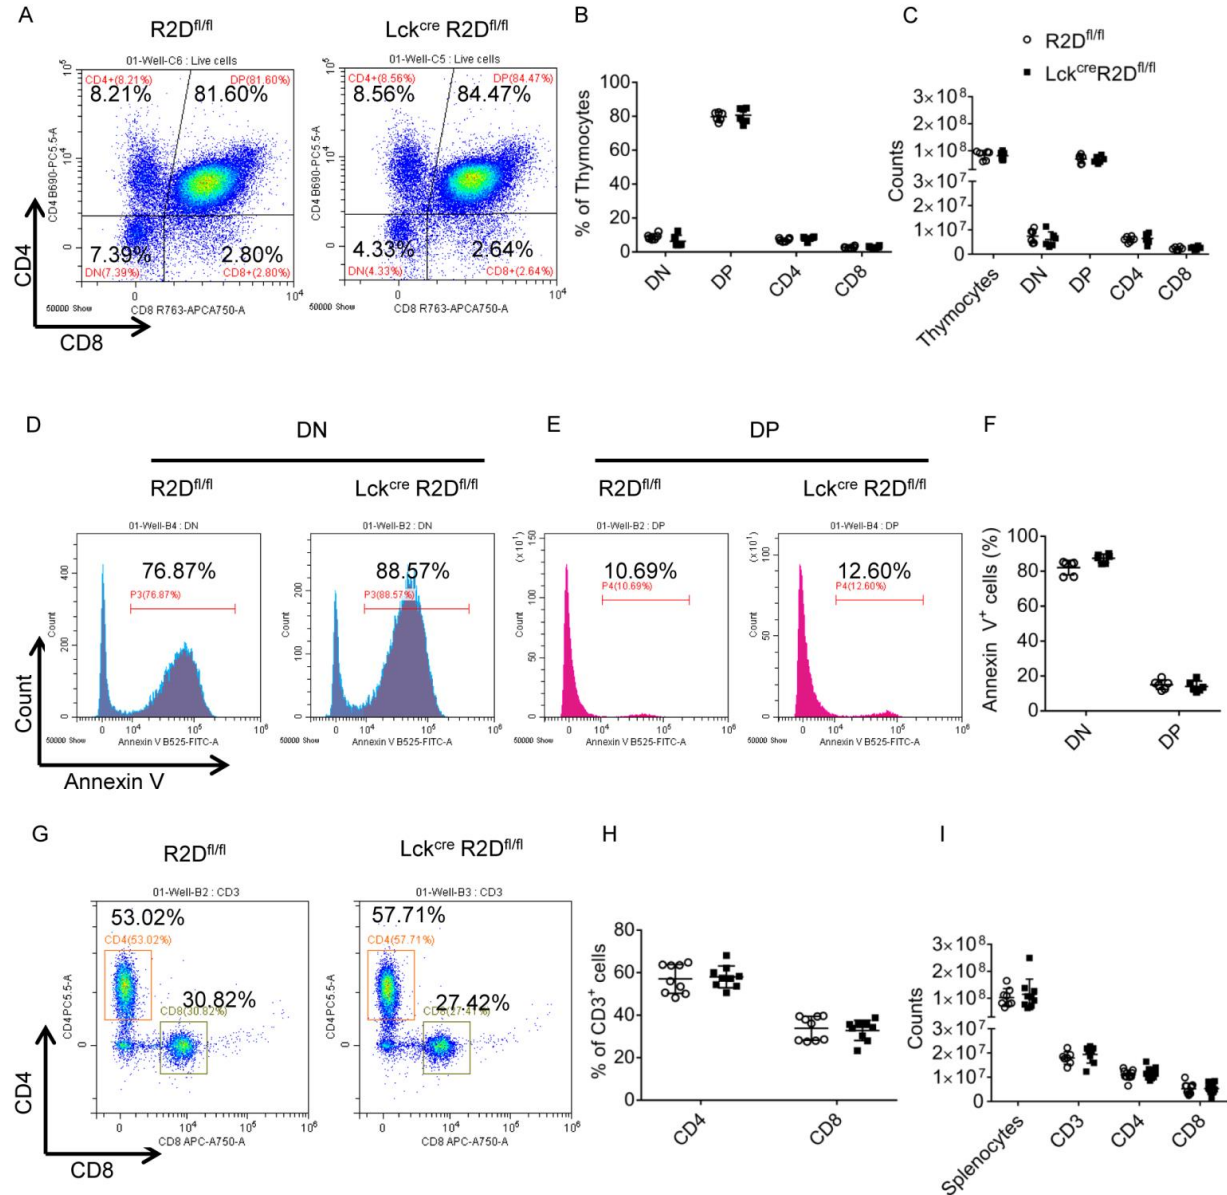

**Supplemental Figure 3. PPP2R2D deficiency in T cells does not impair T cell development in the thymus and the subset distribution in the spleen.** (A-C) Thymocytes isolated from R2D<sup>fl/fl</sup> or Lck<sup>cre</sup>R2D<sup>fl/fl</sup> mice were stained with CD4 and CD8 antibodies and analyzed by flow cytometry. (A) Representative flow cytometry plots. Cumulative data (n=6 mice/group) depicting the percentages (B) and absolute numbers (C) of thymocyte cell populations. DN: Double negative; DP: Double positive. (D-F) Thymocytes isolated from R2D<sup>fl/fl</sup> and Lck<sup>cre</sup>R2D<sup>fl/fl</sup> mice were stimulated with CD3 antibody (1  $\mu$ g/ml) overnight, and subsequently stained with Annexin V, CD4 and CD8 antibodies followed by FACS analysis. (D and E) Representative flow cytometry plots. (F) Cumulative data (n=6 mice/group) depicting the percentage of Annexin V-positive DN or DP thymocytes. (G-I) Splenocytes isolated from R2D<sup>fl/fl</sup>

or Lck<sup>cre</sup>R2D<sup>fl/fl</sup> mice were stained with CD3, CD4 and CD8 antibodies and analyzed by flow cytometry. **(G)** Representative flow cytometry plots. Cumulative data (n = 9-11 mice/group) depicting the percentages **(H)** and absolute numbers **(I)** of splenic CD3, CD4 or CD8 positive cells.

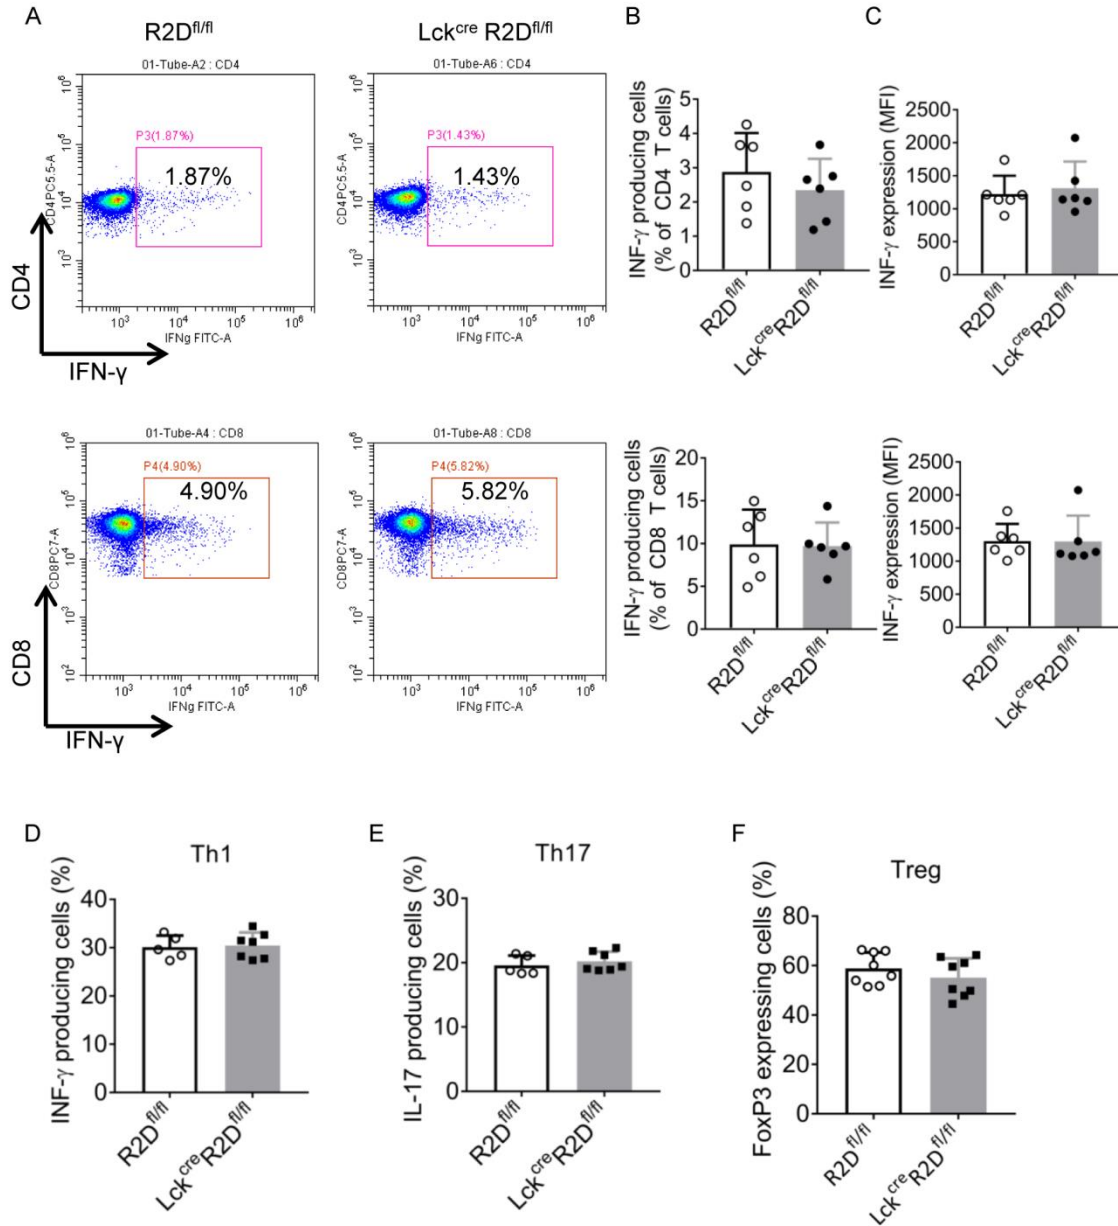

**Supplemental Figure 4. PPP2R2D does not affect IFN- $\gamma$  production, and *in vitro* Th1, Th17 and Treg differentiation in murine T cells.** (A-C) Splenic CD4 or CD8 T cells were stimulated with phorbol myristate acetate (PMA) /ionomycin, and brefeldin A for 4 hours before subjected to fluorescence-activated cell sorting (FACS) analysis of intracellular staining of IFN- $\gamma$  production. Representative flow cytometry plots were shown in (A). Cumulative data ( $n = 6$  mice/group) from individual mice depicting the percentages of IFN- $\gamma$  -producing cells (B) and the expression of IFN- $\gamma$  (C) were presented. MFI: mean fluorescence intensity. (D-F) R2D<sup>fl/fl</sup> and Lck<sup>cre</sup>R2D<sup>fl/fl</sup> naive CD4<sup>+</sup> T cells were cultured under Th1 (D)-, Th17 (E)- or T<sub>reg</sub> (F) -polarizing conditions for 3 days *in vitro* before FACS analysis.

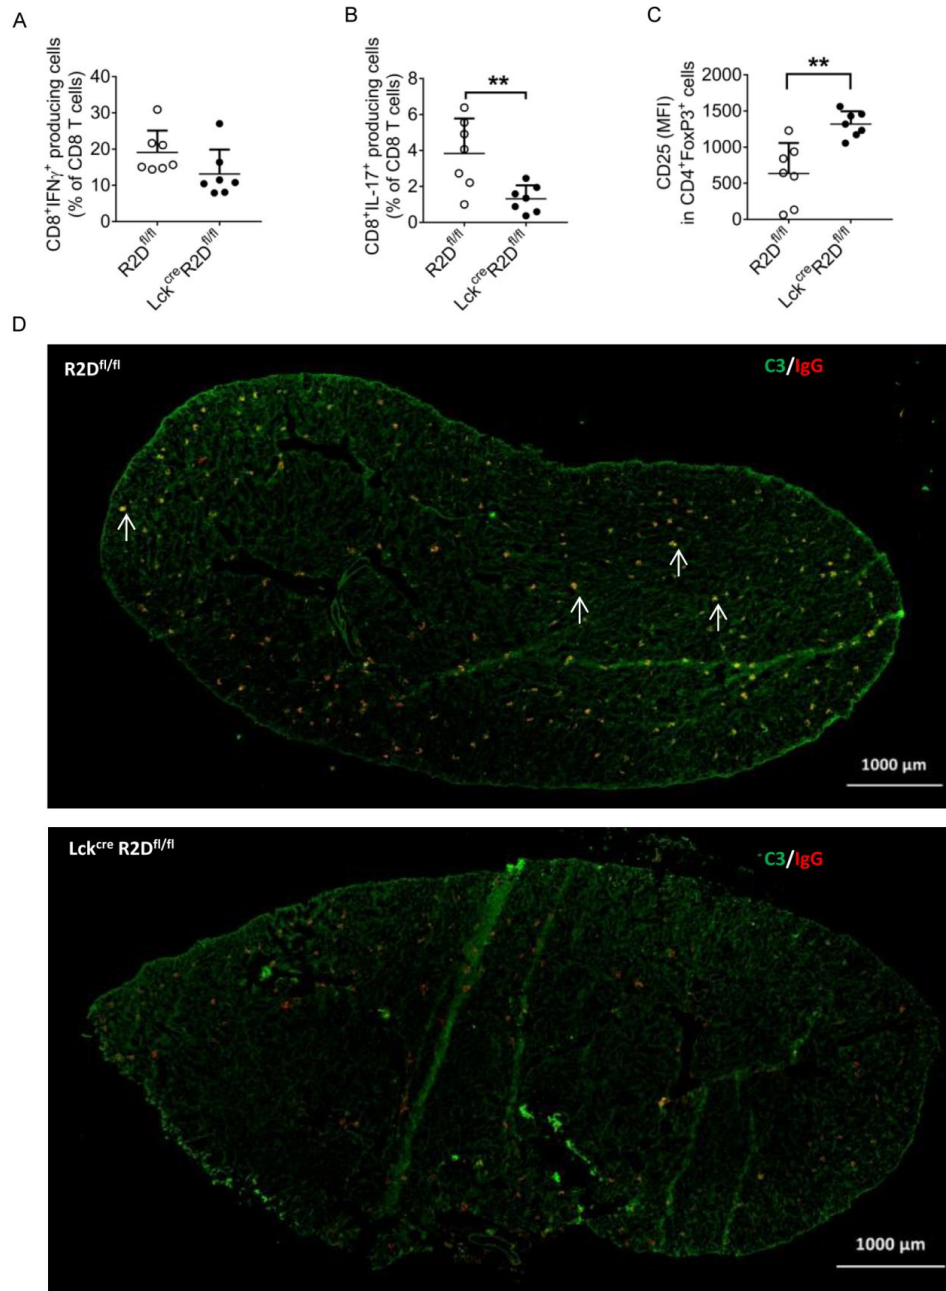

**Supplemental Figure 5. Loss of PPP2R2D in T cells decreases imiquimod-induced lupus-like pathology in mice.** Topical imiquimod was applied to the skin of ear of R2D<sup>fl/fl</sup> and Lck<sup>cre</sup>R2D<sup>fl/fl</sup> mice ( $n = 7$ /group) for 8 weeks. FACS analysis of the percentage of CD3<sup>+</sup>CD8<sup>+</sup>IFN $\gamma$ <sup>+</sup> (**A**) and CD3<sup>+</sup>CD8<sup>+</sup>IL-17A<sup>+</sup> (**B**) cells in spleens. (**C**) The expression levels of T<sub>reg</sub> cell markers CD25 in splenic T<sub>reg</sub> (CD3<sup>+</sup>CD4<sup>+</sup>FoxP3<sup>+</sup>) cells were determined by FACS. (**D**) Representative images of immunofluorescence staining for C3 and IgG from an entire coronal section of kidney. Scale bar: 1000  $\mu$ m. Arrows point to glomeruli. \*\* $P < 0.01$  using Unpaired t-test.

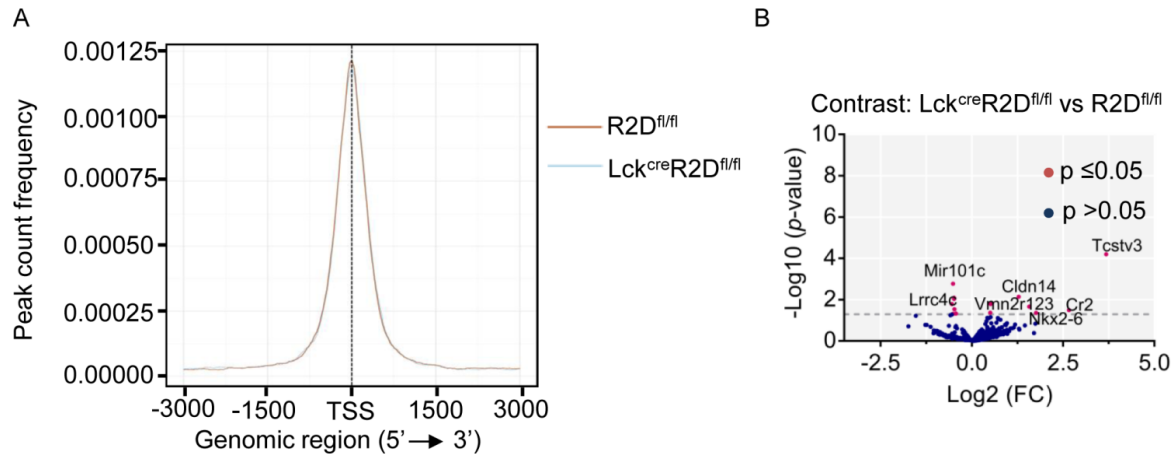

**Supplemental Figure 6. Chromatin accessibility profiles of T<sub>reg</sub> cells with or without PPP2R2D expression using ATAC-seq analysis.** CD4 T<sub>reg</sub> cells were sorted out from spleens of R2D<sup>fl/fl</sup> or Lck<sup>cre</sup>R2D<sup>fl/fl</sup> mice ( $n = 2$  mice/group) by flow cytometry, and *ex vivo* stimulated by IL-2 and plate bound CD3 and CD28 antibodies for 4 hours before subjected to ATAC-seq. **(A)** Histogram showing the distance from the nearest transcription start site (TSS) for all ATAC-seq peaks. **(B)** Volcano plot showing differential chromatin accessibility in CD4 T<sub>reg</sub> cells isolated from R2D<sup>fl/fl</sup> (wild-type) and Lck<sup>cre</sup>R2D<sup>fl/fl</sup> (Knockout) mice. Fold change (FC) is calculated as  $\log_2$  (Lck<sup>cre</sup>R2D<sup>fl/fl</sup> / R2D<sup>fl/fl</sup>). Red dots indicate sites that were significantly different (P value ≤ 0.05).

**Supplemental Table 1 The sites of differential accessibility between R2D<sup>ffl</sup> and Lck<sup>cre</sup>R2D<sup>ffl</sup> Tconv cells**  
(Please see a separate excel file)

**Supplemental Table 2 The sequences of primers used for qPCR.**

| <b>Primer Names</b> | <b>Sequences (5'-&gt;3')</b>                                             |
|---------------------|--------------------------------------------------------------------------|
| PPP2R2A             | Forward: GGTGGTAGAGTTGTCATCTTTCAA<br>Reverse: TCTCCTCTGCTATGAGACTGGA     |
| PPP2R2B             | Forward: ATCCTGCCACCATCACAAAC<br>Reverse: GCGTTGGCAAATACTCTTCG           |
| PPP2R2C             | Forward: AGTTCAACCACACGGGAGAG<br>Reverse: TGGGGCGCATTTTTACTC             |
| PPP2R2D             | Forward: TGGCACTTAGAAATCACAGATAGAA<br>Reverse: AACTCGGCTGCAGTGATGA       |
| PPP2R3A             | Forward: TTTATGAAATGGGGAAAATTGC<br>Reverse: TGGGGGCTTTCCAATAGAG          |
| PPP2R3B             | Forward: GAAGGCTGGACAGCATGG<br>Reverse: CCTGCAGCGTGATCTTCC               |
| PPP2R3C             | Forward: ACGAAAACTTTTGAAGGTTGG<br>Reverse: GACTTTTGCTGTGAAAAATTGCT       |
| PPP2R5A             | Forward: CATTGATCAGAAATTCGTACAACA<br>Reverse: CACGTTCTCTGGGATCTTCAC      |
| PPP2R5B             | Forward: CGCAAACAGTGCAACCAC<br>Reverse: ACACCATTGAAGTGCTCGAA             |
| PPP2R5C             | Forward: CCGTGGTCCTTCTCCATATTC<br>Reverse: GAGGACGCAACACTGACGTA          |
| PPP2R5D             | Forward: TGAGTGTCTACCACCCTCAGC<br>Reverse: CTTGGGCCAAAACCTTGAGAA         |
| PPP2R5E             | Forward: TGGATTCTTCCCCAGAAGC<br>Reverse: TCCACTGATGGAGGAGTAGTTG          |
| IL-2                | Forward: GAATCCCAAACCTCACCAGGATGCTC<br>Reverse: TAGCACTTCCTCCAGAGGTTTGAG |
| β-actin             | Forward: AGCACTGTGTTGGCGTACAG<br>Reverse: AGAGCTACGAGCTGCCTGAC           |
| Mouse PPP2R2D       | Forward: GACGACTTCGATACCCATTTAG<br>Reverse: CGTGGACTTGCTTCTACCATAA       |
| Mouse IL-2          | Forward: AGCAGCTGTTGATGGACCTA<br>Reverse: CGCAGAGGTCCAAGTTCAT            |
| Mouse β-actin       | Forward: CTAAGGCCAACCGTGAAAAG<br>Reverse: ACCAGAGGCATACAGGGACA           |

**Supplemental Table 3 Antibodies used for FACS.**

| <b>Antibody-Conjugate</b>                                | <b>Company (clone)</b>   | <b>Dilution</b> |
|----------------------------------------------------------|--------------------------|-----------------|
| <b>Figure 1, E and F; Supplemental Figure 1, A and B</b> |                          |                 |
| CD3-PE/Cy7                                               | BioLegend (UCHT1)        | 1:100           |
| IL-2-APC                                                 | BioLegend (MQ1-17H12)    | 1:50            |
| IFN- $\gamma$ -Bv421                                     | BioLegend (4S.B3)        | 1:50            |
| IL-4-PE                                                  | BioLegend (8D4-8)        | 1:50            |
|                                                          |                          |                 |
| <b>Supplemental Figure 3</b>                             |                          |                 |
| CD3-PE/Cy7                                               | BioLegend (17A2)         | 1:100           |
| CD4-Percp/Cy5.5                                          | BioLegend (GK1.5)        | 1:100           |
| CD8-APC/Cy7                                              | BD Pharmingen (53-6.7)   | 1:100           |
|                                                          |                          |                 |
| <b>Figure 4, A-C; Supplemental Figure 4, A-C</b>         |                          |                 |
| CD3-APC/Cy7                                              | BioLegend (17A2)         | 1:100           |
| CD4-Percp/Cy5.5                                          | BioLegend (GK1.5)        | 1:100           |
| CD8-PE/Cy7                                               | BioLegend (53-6.7)       | 1:100           |
| IL-2-APC                                                 | BioLegend (JES6-5H4)     | 1:50            |
| IFN- $\gamma$ -FITC                                      | BioLegend (XMG1.2)       | 1:50            |
|                                                          |                          |                 |
| <b>Supplemental Figure 4, D-F</b>                        |                          |                 |
| CD4-PE/Cy7                                               | BioLegend (RM4-5)        | 1:100           |
| IFN- $\gamma$ -Bv421 (Th1)                               | BioLegend (XMG1.2)       | 1:50            |
| IL-17A-PE (Th17)                                         | BioLegend (TC11-18H10.1) | 1:50            |
| or Foxp3-PE (Treg)                                       | eBioscience (FJK-16s)    | 1:50            |
|                                                          |                          |                 |
| <b>Figure 5, B and C; Supplemental Figure 5, A and B</b> |                          |                 |
| CD4-FITC                                                 | BioLegend (RM4-5)        | 1:100           |
| CD8-APC eFluo780                                         | eBioscience (SK1)        | 1:100           |
| Thy1.2-PE/Cy5                                            | BioLegend (53-2.1)       | 1:100           |
| IL-17A-PE                                                | BioLegend (TC11-18H10.1) | 1:50            |
| IFN- $\gamma$ -Pacific Blue                              | BioLegend (4S.B3)        | 1:50            |
|                                                          |                          |                 |
| <b>Figure 5, D and E</b>                                 |                          |                 |
| CD3-PE/Cy7                                               | BioLegend (17A2)         | 1:100           |
| CD4-PercpeFloor 710                                      | Invitrogen (GK1.5)       | 1:100           |
| CD8-APC/Cy7                                              | BD Pharmingen (53-6.7)   | 1:100           |
| FoxP3-AF488                                              | BioLegend (MF-14)        | 1:50            |
| IL-2-APC                                                 | BioLegend (JES6-5H4)     | 1:50            |
|                                                          |                          |                 |
| <b>Figure 5, F and G; Supplemental Figure 5C</b>         |                          |                 |
| CD3-PE/Cy7                                               | BioLegend (17A2)         | 1:100           |
| CD4-PercpeFloor 710                                      | Invitrogen (SK3)         | 1:100           |
| CD8-APC/Cy7                                              | BD Pharmingen (53-6.7)   | 1:100           |

|             |                   |       |
|-------------|-------------------|-------|
| CD25-FITC   | BioLegend (PC61)  | 1:100 |
| FoxP3-AF488 | BioLegend (MF-14) | 1:50  |
| CTLA4-Bv421 | BioLegend (BNI3)  | 1:50  |
| GITR-PE     | BioLegend (DTA-1) | 1:50  |
|             |                   |       |

**Figure 3; Figure 6, A-D,; Supplemental Figure 6, A and B**

|                 |                        |       |
|-----------------|------------------------|-------|
| Thy1.2-PE/Cy7   | BioLegend (53-2.1)     | 1:100 |
| CD4-Percp/Cy5.5 | BioLegend (GK1.5)      | 1:100 |
| CD8-APC/Cy7     | BD Pharmingen (53-6.7) | 1:100 |
| CD25-FITC       | BioLegend (PC61)       | 1:100 |
| CD127-PE/Dazzle | BioLegend (A7R34)      | 1:100 |
|                 |                        |       |

**Figure 6, E-H**

|                   |                        |       |
|-------------------|------------------------|-------|
| CD4-Percp/Cy5.5   | BioLegend (GK1.5)      | 1:100 |
| CD8-APC/Cy7       | BD Pharmingen (53-6.7) | 1:100 |
| IFN- $\gamma$ -PE | BioLegend (XMG1.2)     | 1:50  |
|                   |                        |       |
